# Supplementary material for: Association between CT‐Quantified Body Composition and Recurrence, Survival in Nonmetastasis Colorectal Cancer Patients Underwent Regular Chemotherapy after Surgery
Source: Hindawi journal article supplement (doi:10.1155/2021/6657566), 2021-01-01

Figure S1 Outcomes T2-T3 CRC patients based on CT Body Composition. Outcomes based on visceral fat in T2-T3 CRC patients from the time of diagnosis. (A) Overall survival. (B) PFS. Outcomes based on skeletal muscle in T2-T3 CRC patients from the time of diagnosis. (C) Overall survival (D) PFS

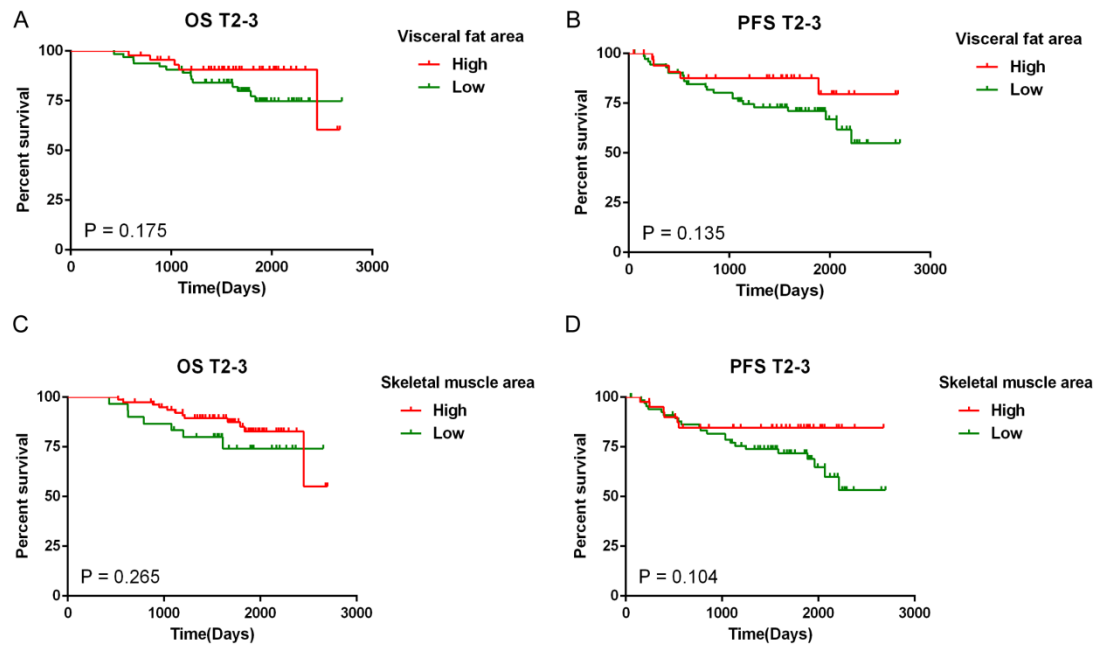

Figure S2 Outcomes CRC patients treated with XELOX based on CT Body Composition. Outcomes based on visceral fat in CRC patients treated with XELOX. (A) Overall survival. (B) PFS. Outcomes based on skeletal muscle in CRC patients treated with XELOX. (C) Overall survival (D) PFS

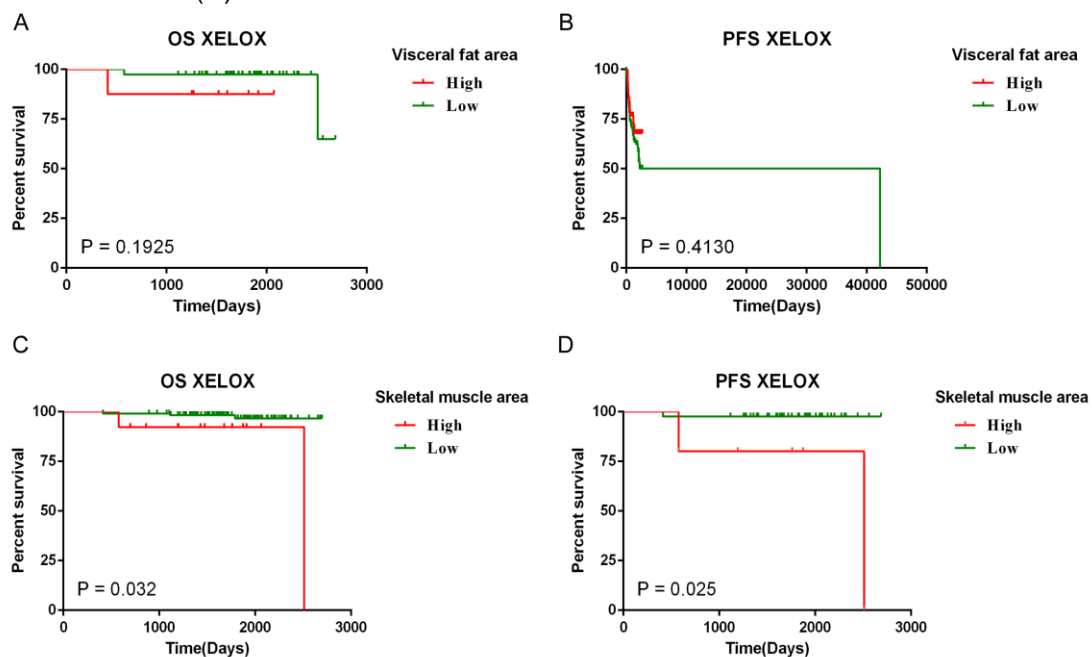

Figure S3 Outcomes CRC patients treated with FOLFOX/FOLFIRI based on CT Body Composition. Outcomes based on visceral fat in CRC patients treated with FOLFOX/FOLFIRI. (A) Overall survival. (B) PFS. Outcomes based on skeletal muscle in FOLFOX/FOLFIRI CRC patients. (C) Overall survival (D) PFS

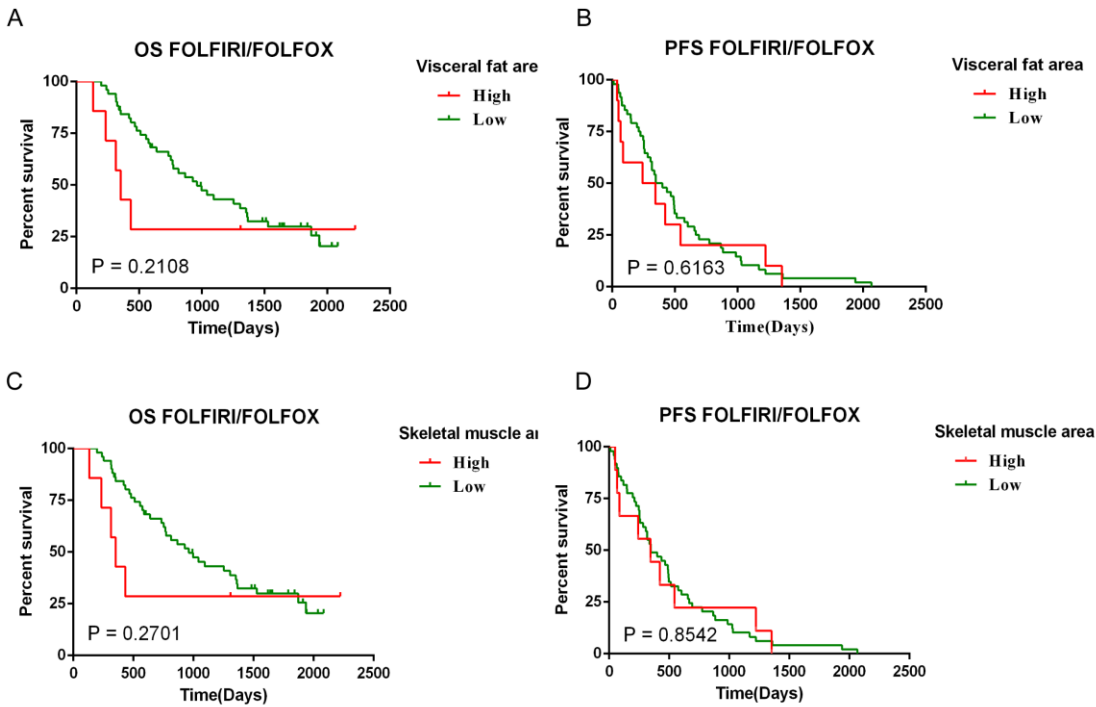

Supplement: f1 [file 6657566.f1.zip]
