# Supplementary material for: Association between CT‐Quantified Body Composition and Recurrence, Survival in Nonmetastasis Colorectal Cancer Patients Underwent Regular Chemotherapy after Surgery
Source: Hindawi journal article supplement (doi:10.1155/2021/6657566), 2021-01-01
Supplement: f1 [file 6657566.f1.zip]

Table S1 Correlation of VAT and Body mass index

|      | ECOG-1     | ECOG-2    | ECOG-3     | P-Value |
|------|------------|-----------|------------|---------|
| T2-3 | 8.72±4.48  | 9.26±4.22 | 6.55±4.55  | 0.3544  |
| T4   | 10.15±4.54 | 8.98±5.68 | 11.05±5.66 | 0.3644  |
|      | Mets 0     | Mets 1-2  | Mets 3-5   | P-Value |
| T2-3 | 9.66±4.02  | 8.41±4.47 | 9.33±4.36  | 0.4554  |
| T4   | 9.37±3.87  | 9.95±5.25 | 10.58±6.10 | 0.8534  |

Table S2 Correlation of SM and Body mass index

|      | ECOG-1    | ECOG-2    | ECOG-3    | P-Value        |
|------|-----------|-----------|-----------|----------------|
| T2-3 | 7.46±2.65 | 6.33±2.46 | 5.56±2.25 | <b>0.04125</b> |
| T4   | 6.35±2.41 | 6.47±2.45 | 6.32±3.41 | 0.9739         |
|      | Mets 0    | Mets 1-2  | Mets 3-5  | P-Value        |
| T2-3 | 6.72±2.90 | 6.57±2.24 | 3.63±1.84 | <b>0.022</b>   |
| T4   | 6.23±2.65 | 6.26±2.55 | 6.81±2.68 | 0.2061         |
